# Supplementary material for: Vanadium oxynitrides as stable catalysts for electrochemical reduction of nitrogen to ammonia: the role of oxygen
Source: Royal Society of Chemistry journal article supplement (doi:10.1039/d0ta08313e), 2020-01-01
Supplement: d0ta08313e1.pdf [file d0ta08313e1.pdf]

Supplementary Information for:

Vanadium oxynitrides as stable catalysts for  
electrochemical reduction of nitrogen to ammonia: the role  
of oxygen

*Jaysree Pan<sup>1</sup>, Heine Anton Hansen<sup>1</sup>, Tejs Vegge<sup>1\*</sup>*

<sup>1</sup> Department of Energy Conversion and Storage, Technical University of Denmark, 2800  
Kgs. Lyngby, Denmark.

\*Correspondence to: Tejs Vegge ([teve@dtu.dk](mailto:teve@dtu.dk)).

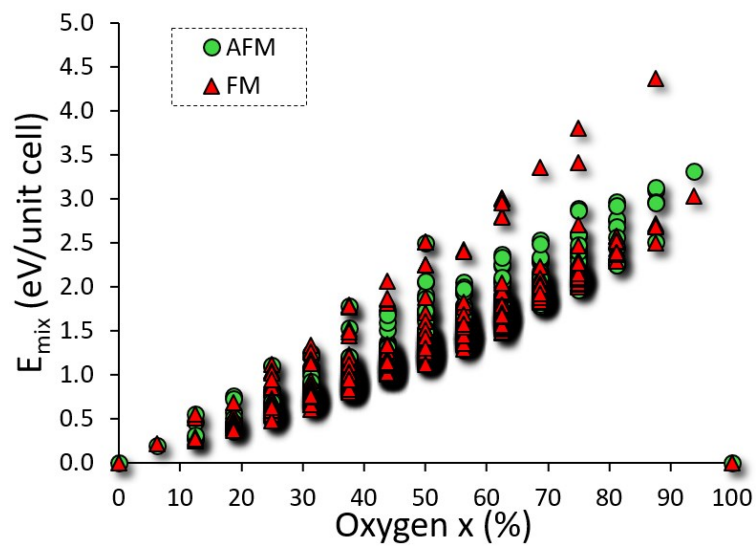

**Figure S1.** The mixing enthalpy of VN and VO with respect to  $V_2O_5$ .

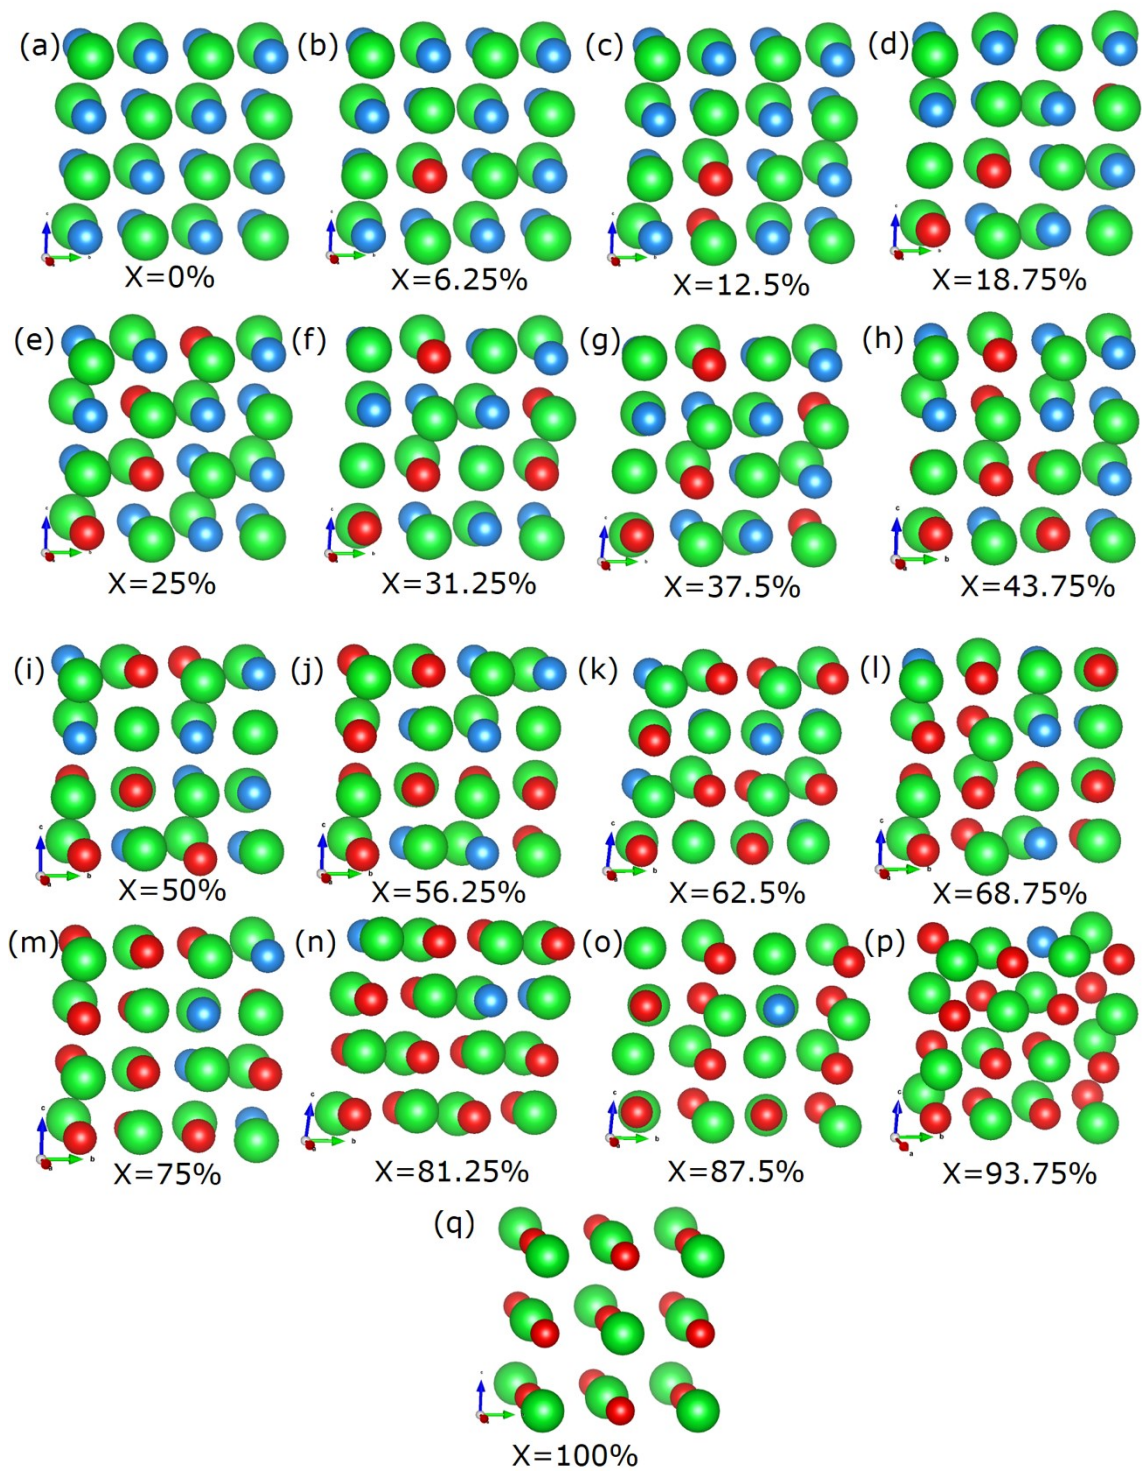

**Figure S2.** Crystal structures of minimum energy configuration with different N/O compositions along the convex hull of the mixing enthalpy calculated for rock-salt VN and VO phases (V: green, O: red and N: blue).

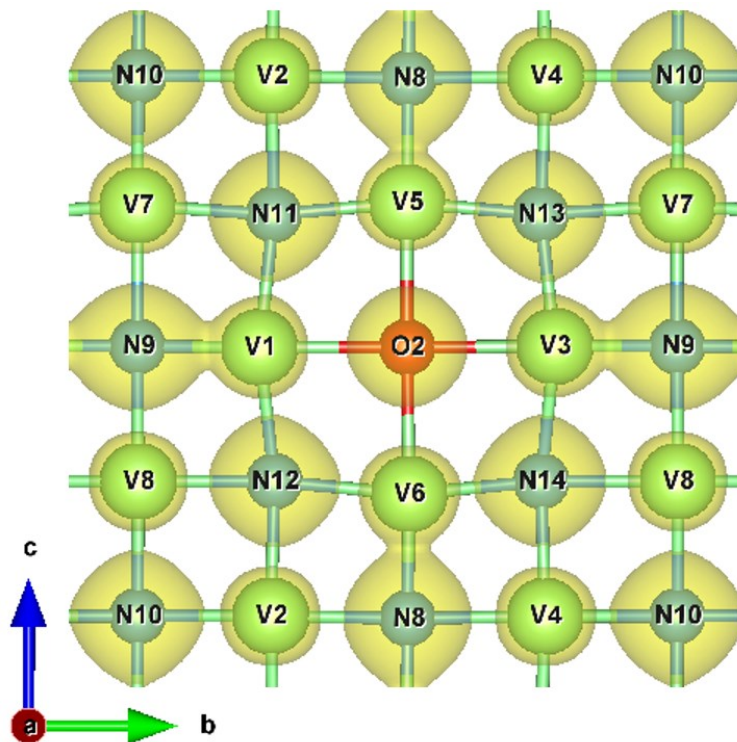

**Figure S3.** Charge density plot of (001) cross-section of VON ( $x=12.75\%$ ) showing the disparity in the chemical bonding between V-N and V-O (V: green, O: red and N: blue).

**Table-S1.** Cell parameters of the lowest energy configurations of VON with different N/O ratio.

| X (%) | a (Å) | b (Å) | c (Å) | $\alpha$ ( $^{\circ}$ ) | $\beta$ ( $^{\circ}$ ) | $\gamma$ ( $^{\circ}$ ) | Volume (Å <sup>3</sup> ) |
|-------|-------|-------|-------|-------------------------|------------------------|-------------------------|--------------------------|
| 00.00 | 4.10  | 8.20  | 8.20  | 90.00                   | 90.00                  | 90.00                   | 276.12                   |
| 06.25 | 4.15  | 8.33  | 8.33  | 90.00                   | 90.00                  | 90.00                   | 287.61                   |
| 12.50 | 4.21  | 8.29  | 8.31  | 89.93                   | 91.22                  | 90.22                   | 289.84                   |
| 18.75 | 4.14  | 8.43  | 8.43  | 89.93                   | 90.00                  | 90.00                   | 294.28                   |
| 25.00 | 4.22  | 8.27  | 8.29  | 90.91                   | 87.84                  | 91.66                   | 289.55                   |
| 31.25 | 4.16  | 8.33  | 8.38  | 88.18                   | 87.35                  | 88.10                   | 289.77                   |
| 37.50 | 4.15  | 8.34  | 8.42  | 86.96                   | 86.45                  | 87.51                   | 290.38                   |
| 43.75 | 4.15  | 8.37  | 8.71  | 90.00                   | 90.00                  | 90.00                   | 302.59                   |
| 50.00 | 4.16  | 8.37  | 8.43  | 90.87                   | 94.64                  | 89.26                   | 292.19                   |
| 56.25 | 4.15  | 8.56  | 8.49  | 89.70                   | 90.00                  | 90.00                   | 302.40                   |
| 62.50 | 4.18  | 8.47  | 8.31  | 85.05                   | 90.51                  | 90.85                   | 293.71                   |
| 68.75 | 4.20  | 8.45  | 8.43  | 90.65                   | 86.60                  | 90.87                   | 298.45                   |
| 75.00 | 4.21  | 8.62  | 8.59  | 90.00                   | 90.00                  | 90.00                   | 311.51                   |
| 81.25 | 4.17  | 8.54  | 8.54  | 84.07                   | 85.34                  | 85.52                   | 300.79                   |
| 87.50 | 4.04  | 9.63  | 8.23  | 86.28                   | 84.64                  | 81.26                   | 314.81                   |
| 93.75 | 4.18  | 8.48  | 8.47  | 90.35                   | 89.73                  | 86.76                   | 299.60                   |
| 100.0 | 4.14  | 8.28  | 8.28  | 90.00                   | 90.00                  | 90.00                   | 284.31                   |

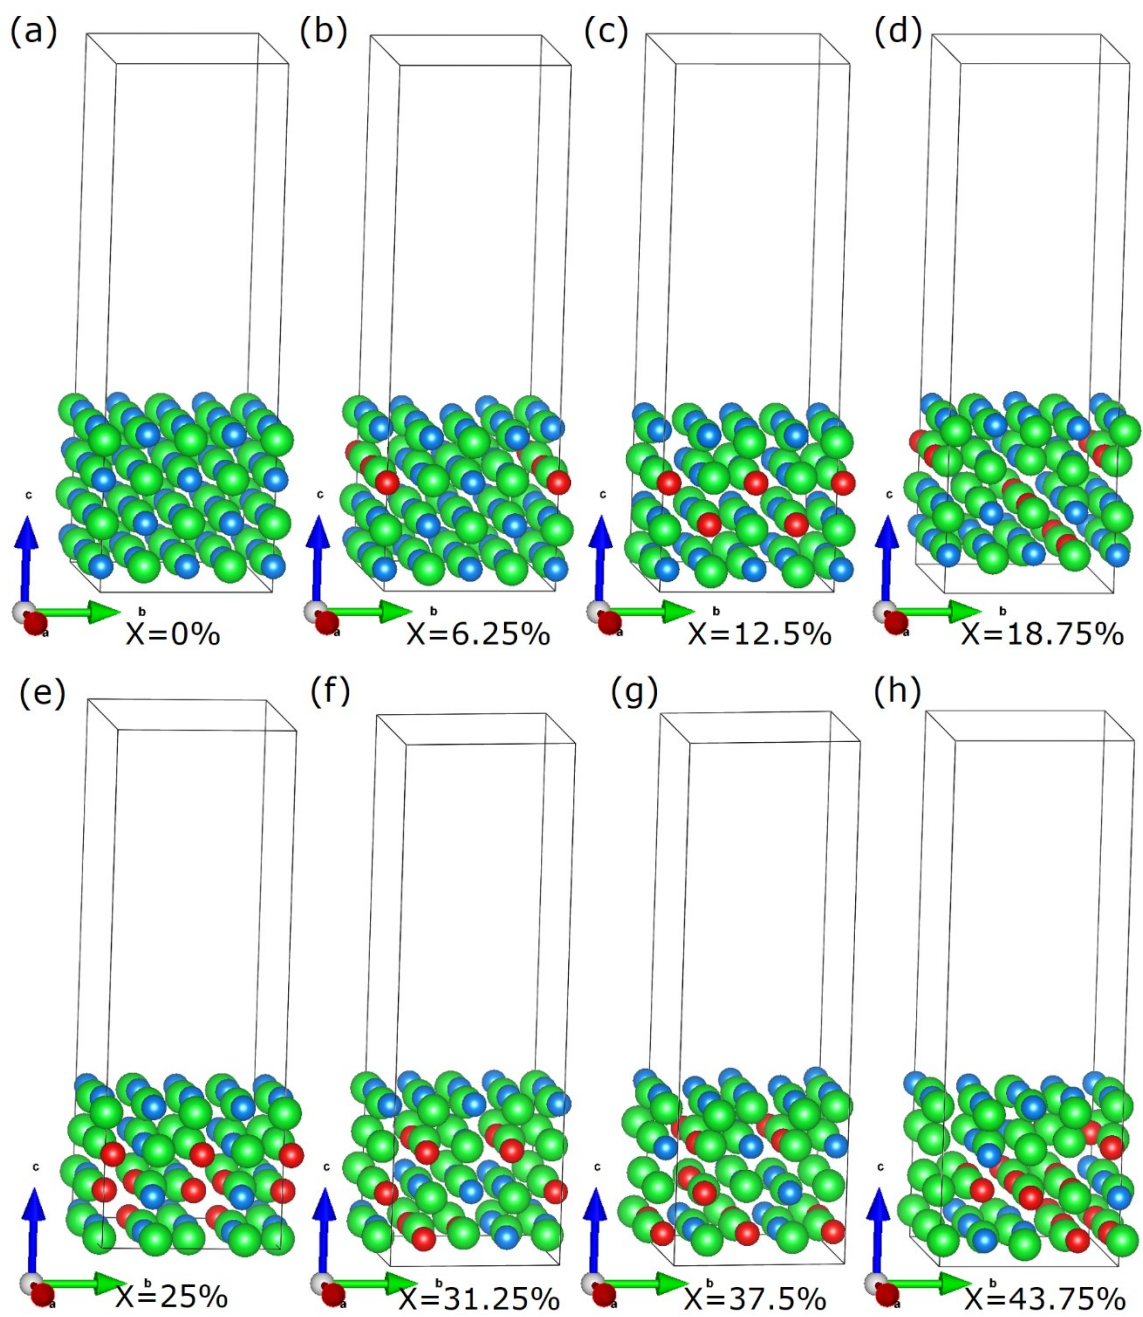

**Figure S4.** (100) slab cleaved from VON crystal with oxygen concentration  $x=0\%$  to  $x=43.75\%$ , (b) (V: green, O: red and N: blue).

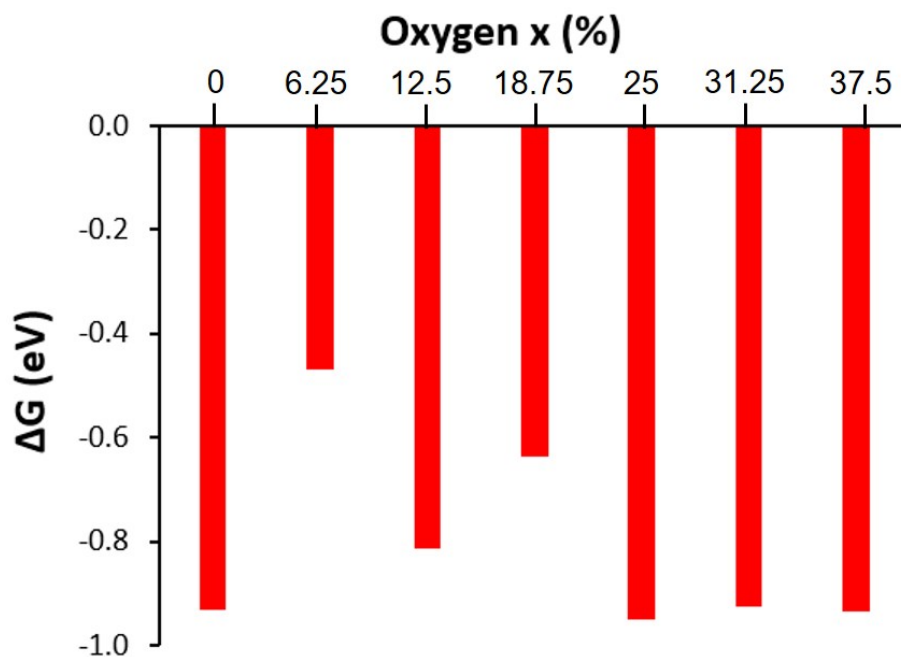

**Figure S5.** Free energy of H<sub>2</sub> formation from hydride ion and proton located at the neighboring V and N on the VON surface.

**Table-S2.** Bader charges on different H ions

| Type of H ions       | Bader charge |
|----------------------|--------------|
| * <sup>N</sup> H     | +1.00        |
| * <sup>V</sup> H     | -0.46        |
| * <sup>N-vac</sup> H | -0.77        |

**Table-S3.** Zero point energy and entropy correction for the gaseous molecules and adsorbates used in the free energy calculations of VON surface at ambient condition (300K and 1atm pressure).

| System      | ZPE (eV) | TS (eV) |
|-------------|----------|---------|
| $H_2O$      | 0.56     | 0.584   |
| $NH_3$      | 0.89     | 0.74    |
| $H_2$       | 0.27     | 0.41    |
| $N_2$       | 0.15     | 0.6     |
| * $N$       | 0.17     | 0.09    |
| * $VH$      | 0.14     | 0.03    |
| * $NH$      | 0.25     | 0.04    |
| * $N_2H$    | 0.69     | 0.07    |
| * $N_3H$    | 1        | 0.17    |
| * $VN$      | 0.08     | 0.04    |
| * $VNH$     | 0.34     | 0.06    |
| * $VNH_2$   | 0.69     | 0.07    |
| * $VNH_3$   | 0.99     | 0.18    |
| * $N-vacOH$ | 0.328    | 0.103   |
| * $N-vacO$  | 0.055    | 0.056   |

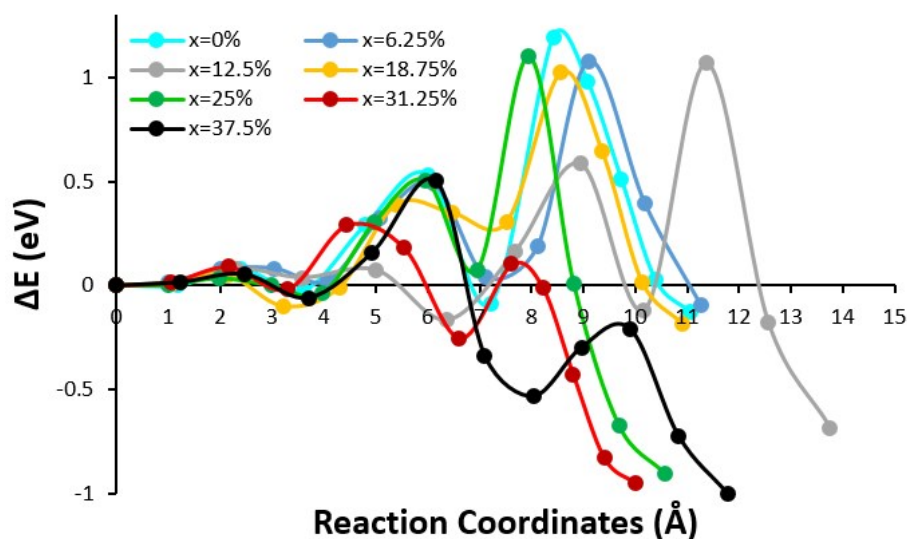

**Figure S6.** N-N adsorption and dissociation path on VON ( $x=0-37.5\%$ ).



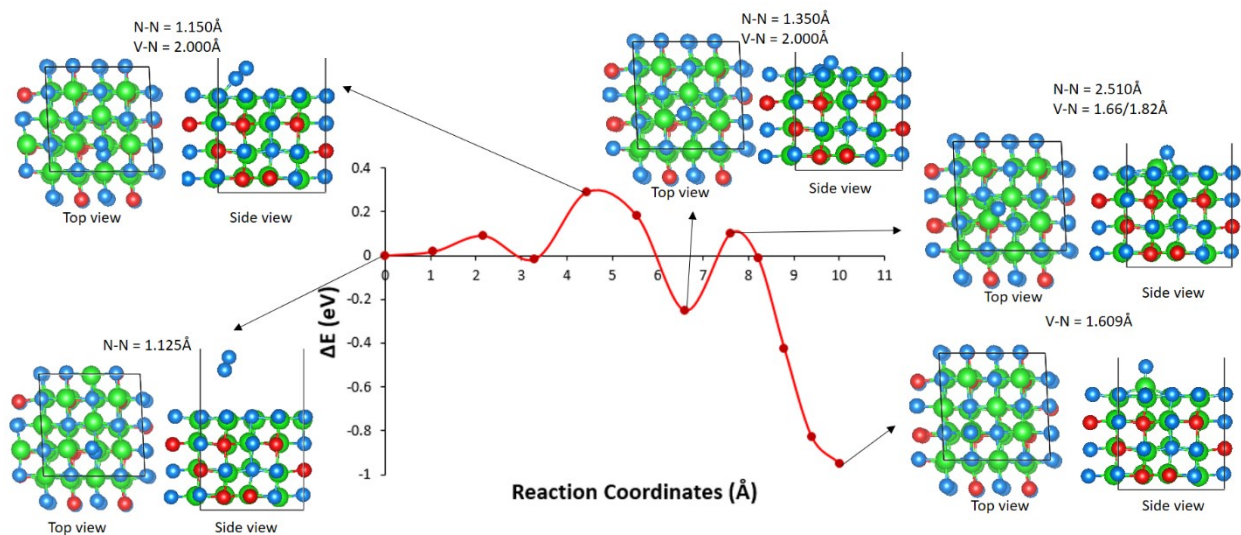

**Figure S7.** N-N adsorption and dissociation path on VON ( $x=31.25\%$ ). Color scheme: green-V, blue-N, and red-O.

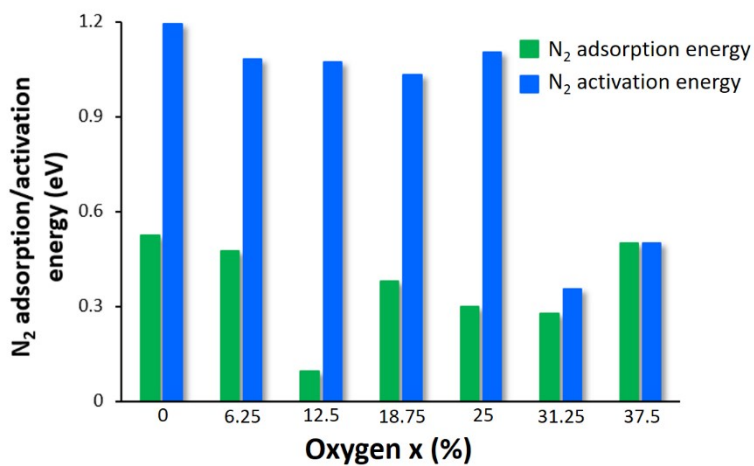

**Figure S8.** The non-dissociative N<sub>2</sub>-adsorption energy (green bars) and the N-N dissociation barrier (blue bars) on VON surface ( $x=0-37.5\%$ ).

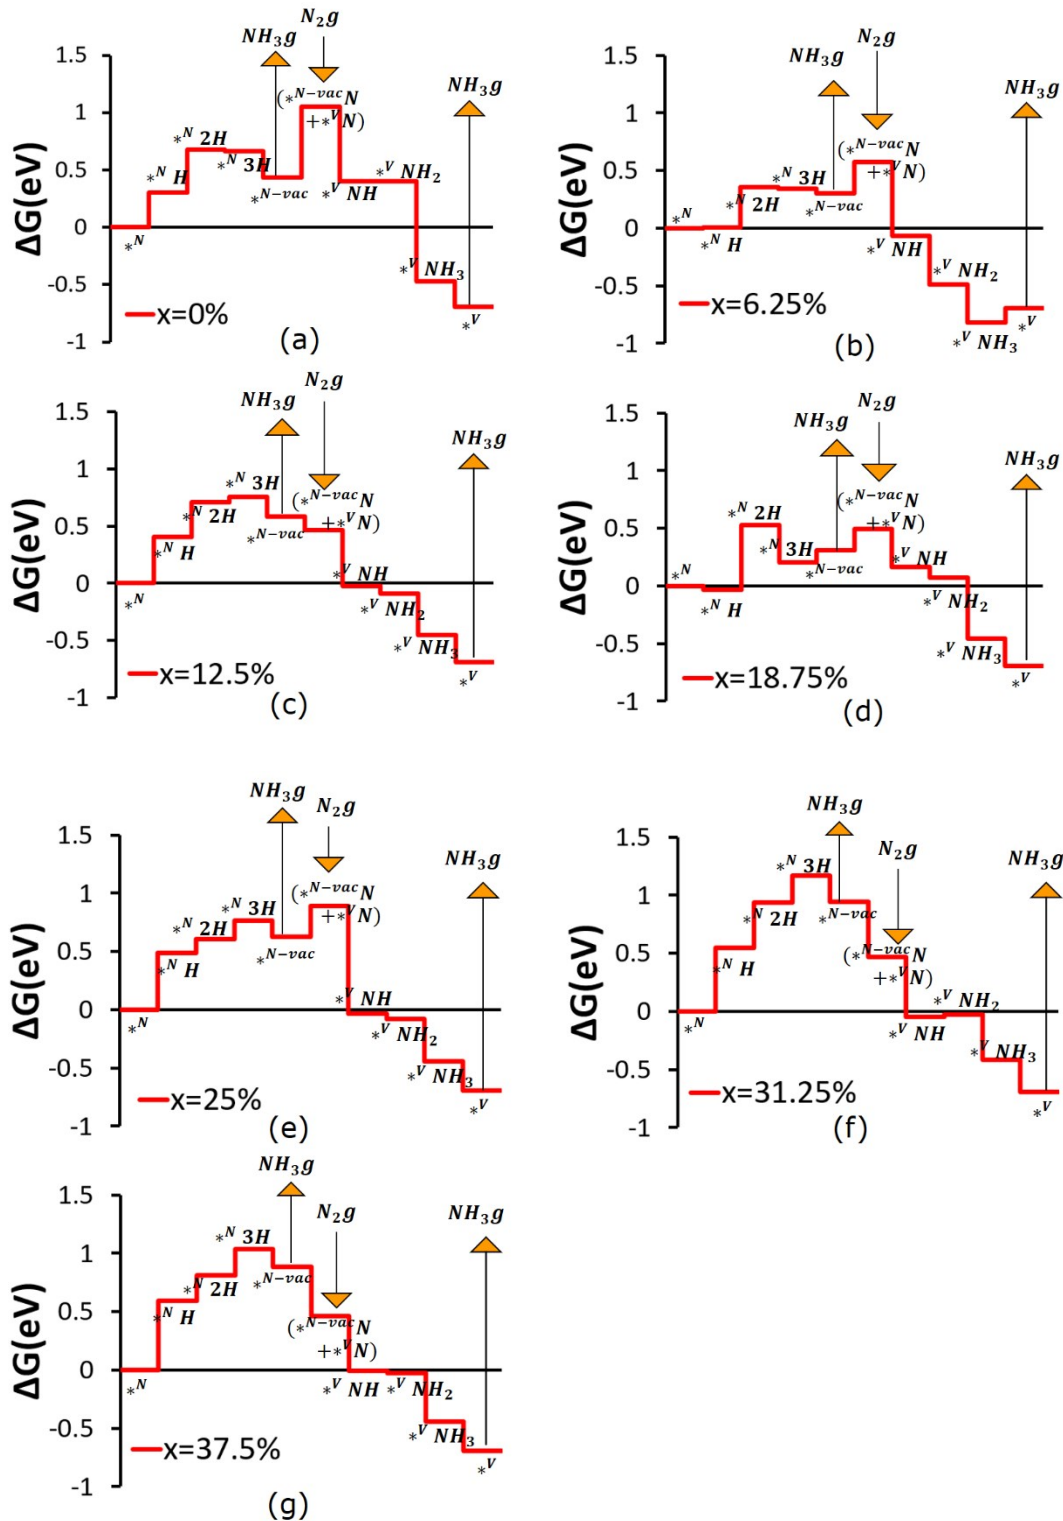

Figure S9. Free energy path of dissociative MvK NRR on VON with  $x=0\%$  to  $x=37.25\%$

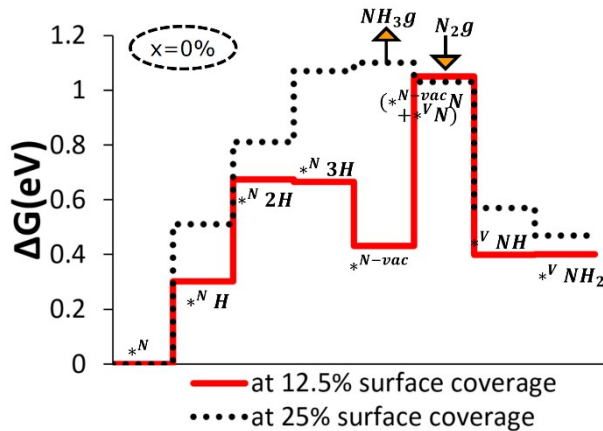

**Figure S10.** The effect of surface coverage of N-vacancy on N-adsorption energy.

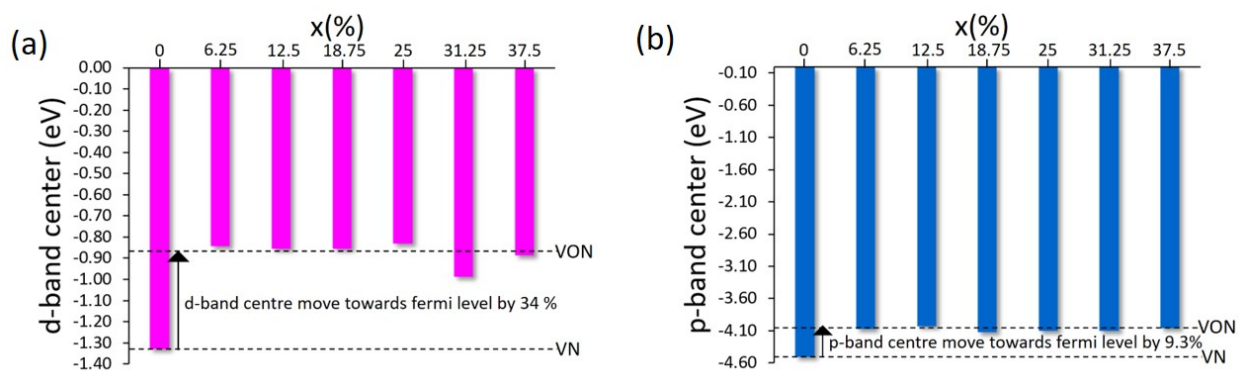

**Figure S11.** **a** d-band center of the surface V ions and **b** p-band center of the anions moved energetically up towards fermi level in presence of O in the system compare to the pure VN.
